# Supplementary material for: X-ray Tomography Unveils the Construction Technique of Un-Montu’s Egyptian Coffin (Early 26th Dynasty)
Source: MDPI journal article supplement (doi:10.3390/jimaging8020039), 2022-02-07
Supplement: s1 [file s1]

## Supplementary Materials

- Wood species identification

As mentioned in the text, 18 samples were drawn from different portions of the coffin, both from the box and from the lid. The numbering of each sample, its position and its species can be observed in Figures S1 and S2.

All the samples drawn from the side planks (samples 1, 2, 3, 4, 5, 8, 9, 10, 13, 14, 16, 17) results of *Ficus sycomorus*. All the connecting elements, both dowels and tenons (samples 6, 7, 12, 15), were of *Tamarix* sp (probably *T. aphylla*).

The sample 11 was too small to obtain any useful information. The 18th sample was a very small wooden wedged at a mortise-tenon connection. The few available anatomical features suggested a timber from a fruity tree of the *Rosaceae* family (such as *Prunus* sp.). In this case, it could be a small element put during a modern restoration.

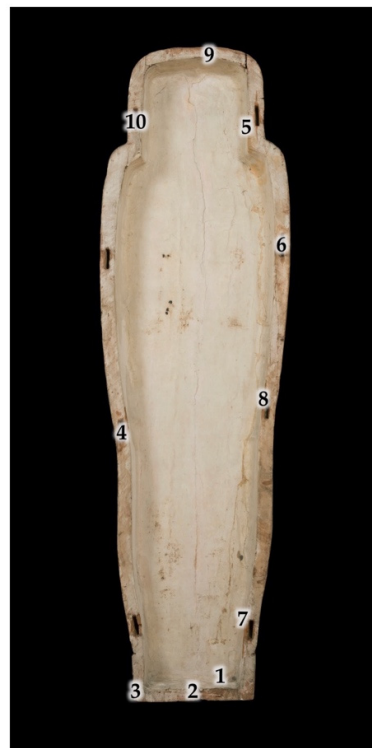

| n  | Description                              | Wood     | Species                | Samples |
|----|------------------------------------------|----------|------------------------|---------|
| 1  | Coffin box, floor board, left plank      | Sycamore | <i>Ficus Sycomorus</i> |         |
| 2  | Coffin box, floor board, right plank     | Sycamore | <i>Ficus Sycomorus</i> |         |
| 3  | Coffin box, right side plank             | Sycamore | <i>Ficus Sycomorus</i> |         |
| 4  | Coffin box, mortise, right side          | Sycamore | <i>Ficus Sycomorus</i> |         |
| 5  | Coffin box, left side plank              | Sycamore | <i>Ficus Sycomorus</i> |         |
| 6  | Coffin box, left side, dowel for mortise | Tamarisk | <i>Tamarix sp</i>      |         |
| 7  | Coffin box, left side, tenon             | Tamarisk | <i>Tamarix sp</i>      |         |
| 8  | Coffin box, left side, mortise           | Sycamore | <i>Ficus Sycomorus</i> |         |
| 9  | Coffin box, head wall                    | Sycamore | <i>Ficus Sycomorus</i> |         |
| 10 | Coffin box, right side, mortise          | Sycamore | <i>Ficus Sycomorus</i> |         |

Figure S1. Wood samples from the box.

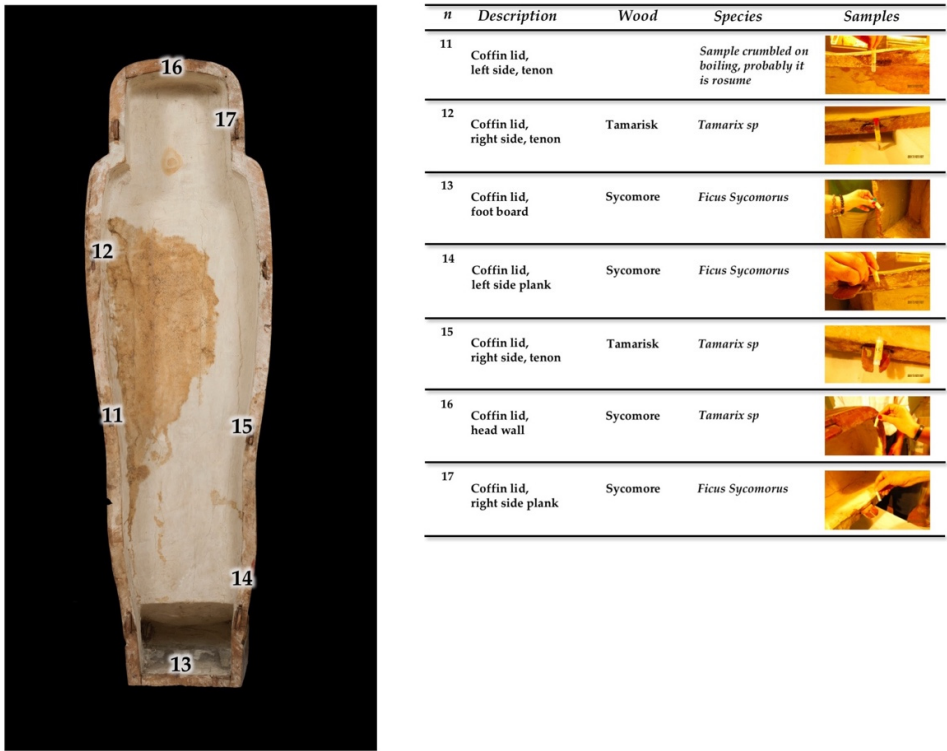

Figure S2. Wood samples from the lid.
